1 Replacing the Calvin cycle with the reductive glycine pathway in  
2 *Cupriavidus necator*

3 Nico J. Claassens\*, Guillermo Bordanaba-Florit, Charles A. R. Cotton, Alberto De Maria, Max Finger-  
4 Bou, Lukas Friedeheim, Natalia Giner-Laguarda, Martí Munar-Palmer, William Newell, Giovanni  
5 Scarinci, Jari Verbunt, Stijn T. de Vries, Suzan Yilmaz, Arren Bar-Even\*

6 Max Planck Institute of Molecular Plant Physiology, Am Mühlenberg 1, 14476 Potsdam-Golm, Germany

7 \*corresponding authors; phone: +49 331 567-8910

8 Email: Bar-Even@mpimp-golm.mpg.de

9 Email: Nico.claassens@wur.nl;

10

11 Keywords: one-carbon metabolism; metabolic engineering; microbial electrosynthesis; glycine cleavage  
12 system; tetrahydrofolate.

13

14 **Abstract**

15 Formate can be directly produced from CO<sub>2</sub> and renewable electricity, making it a promising microbial  
16 feedstock for sustainable bioproduction. *Cupriavidus necator* is one of the few biotechnologically-relevant  
17 hosts that can grow on formate, but it uses the inefficient Calvin cycle. Here, we redesign *C. necator*  
18 metabolism for formate assimilation via the highly efficient synthetic reductive glycine pathway. First, we  
19 demonstrate that the upper pathway segment supports glycine biosynthesis from formate. Next, we explore  
20 the endogenous route for glycine assimilation and discover a wasteful oxidation-dependent pathway. By  
21 integrating glycine biosynthesis and assimilation we are able to replace *C. necator*'s Calvin cycle with the  
22 synthetic pathway and achieve formatotrophic growth. We then engineer more efficient glycine metabolism  
23 and use short-term evolution to optimize pathway activity, doubling the growth yield on formate and  
24 quadrupling the growth rate. This study thus paves the way towards an ideal microbial platform for realizing  
25 the formate bioeconomy.

26

27

28

29

## 30 **Introduction**

31 Microbial biosynthesis offers an environmentally friendly alternative to fossil-based production. However, the  
32 limited availability and questionable sustainability of microbial feedstocks hamper the expansion of  
33 biotechnological production and the establishment of a circular carbon economy. The common substrates for  
34 microbial bioproduction are plant-based sugars, the utilization of which competes with food supply and  
35 necessitates vast land use that negatively impacts the environment. Moreover, alternative feedstocks, such  
36 as lignocellulosic biomass, suffer from crucial drawbacks, such as difficult and expensive processing<sup>1</sup>. A  
37 fundamental limitation of all photosynthesis-based resources is the low energy conversion efficiency  
38 associated with this process, typically below 1%<sup>2,3</sup>.

39 Electromicrobial production has gained attention as an alternative route towards sustainable biotechnology<sup>4,5</sup>.  
40 This strategy is based on the use of two key feedstocks: CO<sub>2</sub>-free electricity – e.g. from solar, wind, hydro –  
41 the production of which is rapidly growing, and CO<sub>2</sub>, a virtually unlimited carbon source, captured either from  
42 point sources or directly from air. Some microbes can grow by receiving electrons directly from a cathode;  
43 however, low current densities limit the economic viability of this approach<sup>6,7</sup>. A more feasible option is the  
44 electrochemical production of small reduced compounds<sup>6</sup> that are subsequently fed to microbes and then  
45 converted into value-added chemicals. Among the possible mediator compounds, hydrogen, carbon  
46 monoxide, and formate can be produced at high efficiency and rate<sup>8</sup>. Whereas hydrogen and carbon monoxide  
47 are gases of low solubility, formate is completely miscible and can be readily introduced to microbial cells  
48 without mass transfer limitations and without major safety concerns<sup>9</sup>. Hence, establishing a “formate bio-  
49 economy” has been proposed as a route towards realizing a circular carbon economy<sup>10</sup>.

50 *Cupriavidus necator* (formerly *Ralstonia eutropha*) is one of the very few formatotrophic microorganisms that  
51 have been extensively explored for biotechnological use<sup>11,12</sup>. *C. necator* has been industrially utilized for the  
52 production of polyhydroxybutyrate and further engineered for the biosynthesis of various commodity and  
53 specialty chemicals such as isopropanol or terpenoids<sup>13–15</sup>. However, conversion of formate to biomass and  
54 products by this bacterium is hampered by low yields due to the use of the inefficient and ATP-wasteful Calvin  
55 cycle (Fig. 1)<sup>16,17</sup>.

56 We previously proposed the synthetic reductive glycine pathway (rGlyP) as the most energy-efficient formate  
57 assimilation route that can operate under aerobic conditions<sup>16</sup>. In this pathway, formate is condensed with  
58 tetrahydrofolate (THF) and further reduced to methylene-THF. Then, the glycine cleavage system (GCS),  
59 operating in the reductive direction, condenses methylene-THF with CO<sub>2</sub> and ammonia to produce glycine.  
60 Glycine is subsequently metabolized to serine and deaminated to pyruvate which serves as a biomass  
61 precursor (Fig. 1). The rGlyP is considerably more efficient than the Calvin cycle: while the latter pathway can  
62 maximally generate ~1.2 mole pyruvate per 10 mole formate consumed, the rGlyP can theoretically produce  
63 ~1.6 mole pyruvate for the same amount of feedstock, i.e., increasing yield by ~35% (Fig. 1).

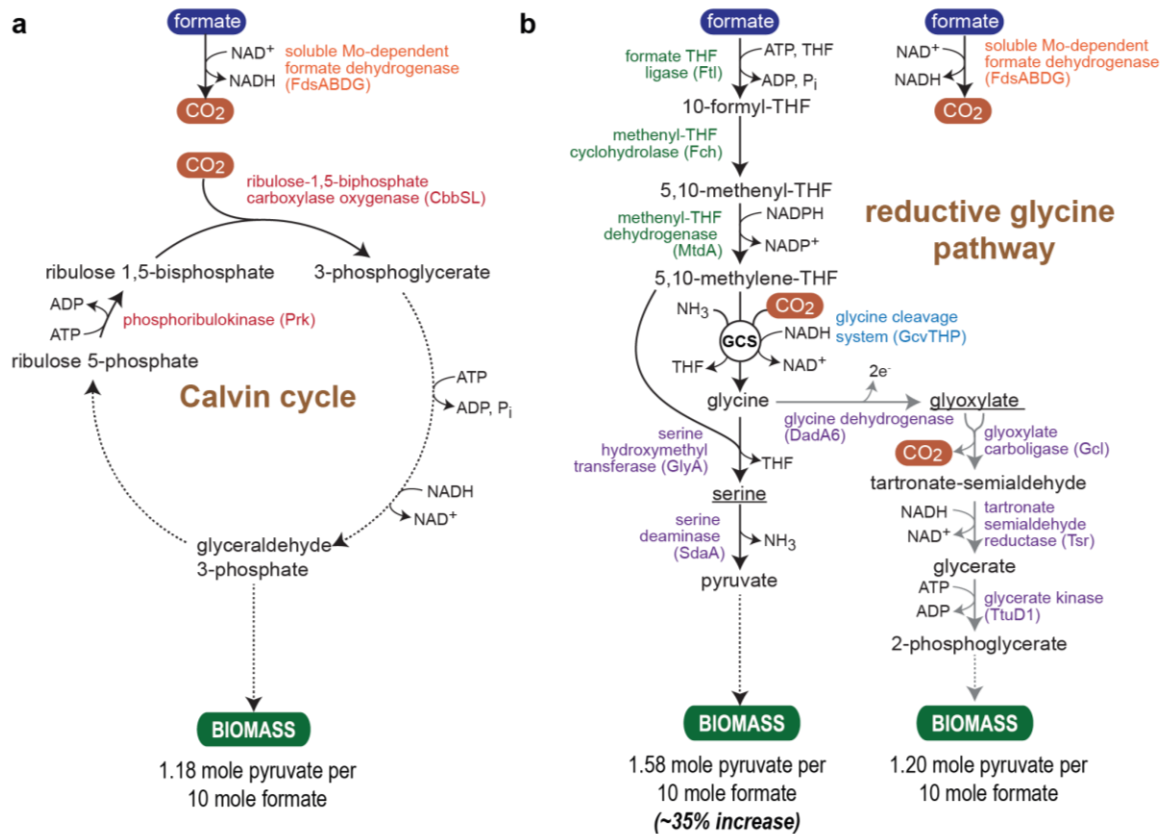

64 **Figure 1. Structures of the native Calvin cycle and synthetic reductive glycine pathway (rGlyP).** (a) Simplified diagram showing  
 65 formate dehydrogenase and the Calvin cycle active in WT *C. necator* (b) Two variants of the rGlyP are shown: (i) the original design  
 66 in which glycine is assimilated via serine and pyruvate and (ii) an alternative variant where glycine is first oxidized to glyoxylate, which  
 67 is then assimilated via the glycerate pathway. *C. necator* protein names are written in brackets, except for the enzymes catalyzing  
 68 formate metabolism to methylene-THF (green), where the proteins are from *M. extorquens*. Pyruvate molar yields per formate are  
 69 theoretical estimates based on the number of formate molecules directly assimilated (Calvin: 0, rGlyP-ser: 2, rGlyP-glyox: 2), used for  
 70 NADH production (Calvin: 5, rGlyP-ser: 1, rGlyP-glyox: 3), used for NADPH production (Calvin: 0, rGlyP-ser: 2\*(1.33), rGlyP-glyox:  
 71 2\*(1.33), where NADPH requires a proton translocation) and used for ATP production (Calvin: 7/2, rGlyP-ser: 2/2, rGlyP-glyox: 2/2,  
 72 where a P/O ratio of 2 was assumed). Abbreviation: GCS, Glycine cleavage system; THF, tetrahydrofolate.

73 Here, we replace the Calvin cycle of *C. necator* with the rGlyP. First, we show that overexpression of the  
 74 upper segment of the pathway enables an otherwise glycine-auxotrophic *C. necator* to utilize formate for  
 75 glycine biosynthesis. We then evolve *C. necator* to utilize glycine as a carbon source, revealing that, rather  
 76 than being converted to serine and pyruvate, this amino acid is first oxidized to glyoxylate, which is  
 77 subsequently assimilated via the well-known glycerate route<sup>18,19</sup> (Fig. 1). Next, we construct a strain in which  
 78 the Calvin cycle was disrupted and is thus unable to grow on formate. Integration of the two segments of the  
 79 rGlyP restores the formatotrophic growth of this strain, albeit at a low growth rate. We further optimize pathway  
 80 activity by shifting overexpression from a plasmid to the genome, forcing glycine assimilation via serine, and  
 81 conducting a short-term adaptive evolution. Our final strain displays a biomass yield on formate equivalent to  
 82 that of the WT strain using the Calvin cycle, hence confirming the recovery of the growth phenotype after the  
 83 fundamental rewiring of cellular metabolism towards the use of the synthetic route. Our study therefore paves  
 84 the way towards a highly efficient platform strain for the production of value-added chemicals from CO<sub>2</sub>.

## 85 Results

### 86 Engineering conversion of formate to glycine

87 First, we aimed to establish the upper segment of the rGlyP which converts formate into glycine (Fig. 1). *C.*  
88 *necator* natively harbors all the enzymes of this segment with the exception of formate-THF ligase, which  
89 needs to be heterologously expressed. In a previous study in *E. coli* we observed that the native FOLD enzyme  
90 – encoding for a bifunctional methylene-THF dehydrogenase / methenyl-THF cyclohydrolase – is not suitable  
91 for carrying high flux in the reductive direction<sup>20</sup>. Hence, we decided to heterologously express three enzymes  
92 from *Methylobacterium extorquens* that naturally support high reductive flux from formate to methylene-THF  
93 (Fig. 1): Ftl (formate-THF ligase), Fch (methenyl-THF cyclohydrolase), and MtdA (methylene-THF  
94 dehydrogenase)<sup>21</sup>. The genes encoding for these enzymes were cloned from *M. extorquens* and assembled  
95 into a synthetic operon, in a plasmid named pC1, using four different constitutive promoters of varying strength  
96 (Methods and Fig. S1, S2). For the subsequent conversion of methylene-THF to glycine, we overexpressed  
97 the native genes of the GCS (*gcvT*, *gcvH*, and *gcvP*) from a synthetic operon on a second plasmid (termed  
98 pC2), which was constructed with three constitutive promoters of different strength (Methods and Fig. S1, S2).

99 We then generated a *C. necator* strain auxotrophic to glycine by deleting the genes encoding for serine  
100 hydroxymethyltransferase ( $\Delta$ *glyA*), threonine aldolase ( $\Delta$ *ltaA*), and glycine acetyltransferase ( $\Delta$ *kbl*) (Fig. 2a).  
101 This strain could grow only when supplemented with glycine (Fig. 2b, brown line vs. grey line). We transformed  
102 this strain with pC1 and pC2 carrying different combinations of promoters. All strains harboring pC2 with  
103 promoter p<sub>3</sub> (the weakest promoter tested), regardless of the promoter in pC1, were able to grow with fructose  
104 as main carbon source and formate and CO<sub>2</sub> as glycine source (at 10% CO<sub>2</sub> and 100 mM bicarbonate; high  
105 CO<sub>2</sub> concentration is required to thermodynamically and kinetically push the glycine cleavage system in the  
106 reductive direction). Yet, the strain harboring the weak promoter p<sub>14</sub> in pC1 showed the best growth. The  
107 growth of the strain carrying pC1-p<sub>3</sub> and pC2-p<sub>14</sub> on fructose and formate but in the absence of glycine (green  
108 line in Fig. 2b), was almost identical to the positive control, in which glycine was added to the medium (brown  
109 line in Fig. 2b). Growth was also possible in the absence of fructose, in which case formate served both as a  
110 carbon source for glycine biosynthesis and as a source of reducing power source to support growth via the  
111 Calvin cycle (orange line in Fig. 2b). Interestingly, transformation of the glycine auxotroph strain with pC1-p<sub>3</sub>  
112 alone sufficed to support glycine biosynthesis from formate, albeit at a low rate (blue line in Fig. 2b), indicating  
113 that the native expression of the GCS supports at least some reductive activity.

114 To confirm that glycine as well as the cellular C<sub>1</sub> moieties are indeed generated from formate assimilation, we  
115 conducted a <sup>13</sup>C-labeling experiment. We cultivated the strain harboring pC1-p<sub>3</sub> and pC2-p<sub>14</sub> on unlabeled  
116 fructose and CO<sub>2</sub> as well as <sup>13</sup>C-formate. We measured the labeling pattern of glycine and histidine (the latter  
117 contains a carbon derived from 10-formyl-THF) as well as serine, which was expected not to be labeled. We  
118 found glycine and histidine to be almost completely once labeled and serine to be unlabeled, thus confirming  
119 that formate is assimilated to the THF pool and into glycine (Fig. 2c).

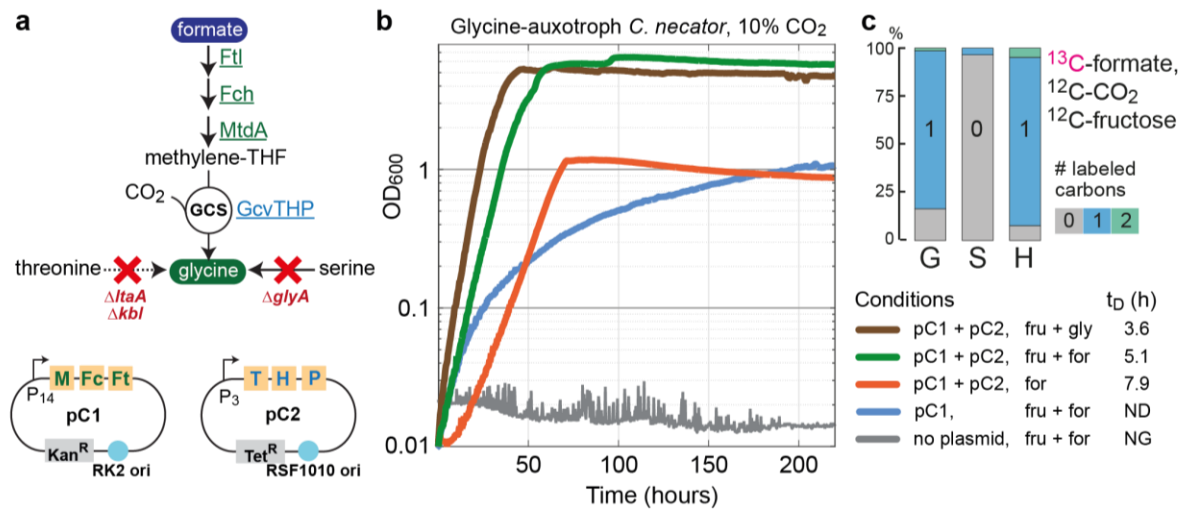

**Figure 2. Engineering glycine biosynthesis from formate.** (a) Selection scheme for the selection of glycine biosynthesis from formate in an otherwise glycine auxotroph *C. necator* strain (deleted in *glyA*, *ItaA*, and *kbl*). Proteins that were overexpressed are underlined. The plasmids resulting in the fastest growth (pC1-p<sub>14</sub>, pC2-p<sub>3</sub>) are shown below ('M' corresponds to *mtdA*; 'Fc' to *fch*; 'Ft' to *ftt*; 'T' to *gcvT*; 'H' to *gcvH*; and 'P' to *gcvP*). (b) Overexpression of the pathway enzymes rescue the growth of a glycine auxotroph with formate as glycine source. Growth experiments were conducted in 96-well plate readers in minimal medium (JMM) supplemented with 100 mM bicarbonate and 10% CO<sub>2</sub> in the headspace. When added, the concentrations of the different carbon sources were 20 mM fructose ('fru'), 8 mM glycine ('gly'), and 80 mM formate ('for'). 'ND' corresponds to 'not determined', and 'NG' to 'no growth'. Growth experiments were performed in triplicates and showed identical growth curves (±5%); hence, representative curves and average doubling times (t<sub>D</sub>) are shown. All experiments were repeated independently at least three times and showed highly similar growth behavior. (c) <sup>13</sup>C-labeling of proteinogenic amino acids after cultivating the glycine auxotroph harboring pC1 and pC2 on unlabeled fructose and CO<sub>2</sub> as well as <sup>13</sup>C-formate. The labeling pattern confirms the operation of the upper segment of the pathway, as glycine (G) and histidine (H, harboring a carbon derived from formyl-THF) are dominantly labeled once, while serine (S) is non-labeled. We note that the small fraction of non-labeled glycine might be attributed to the amination of glyoxylate via the promiscuous activity of aminotransferase enzymes; we did not delete isocitrate lyase, the source of cellular glyoxylate, as we found this deletion to hamper cell viability. Labeling experiments are averages from duplicates.

## Exploring growth on glycine

Next, we turned our attention to the downstream segment of the rGlyP, that is, assimilation of glycine into biomass. We explored the native capacity of *C. necator* to grow on glycine. We inoculated twelve parallel cultures of *C. necator* on a minimal medium with glycine as a sole carbon source. Initially, no growth was observed. However, after a week, three of the inoculated cultures started growing. When reinoculated into a fresh medium with glycine, these cultures started growing immediately, possibly due to genetic adaptation. We performed whole-genome sequencing of these three strains and found that each had a sense mutation in either *gltR1* or *gltS1* (Supplementary Data 1). These two genes reside in the same operon and encode for a dual-component signal-regulator system that activates the expression of *gltP1*, encoding for a putative dicarboxylate/amino acid transporter (Fig. 3a). While we detected several other mutations in specific strains (Supplementary Data 1), they did not appear in all three strains and hence they probably have lower contribution to growth on glycine.

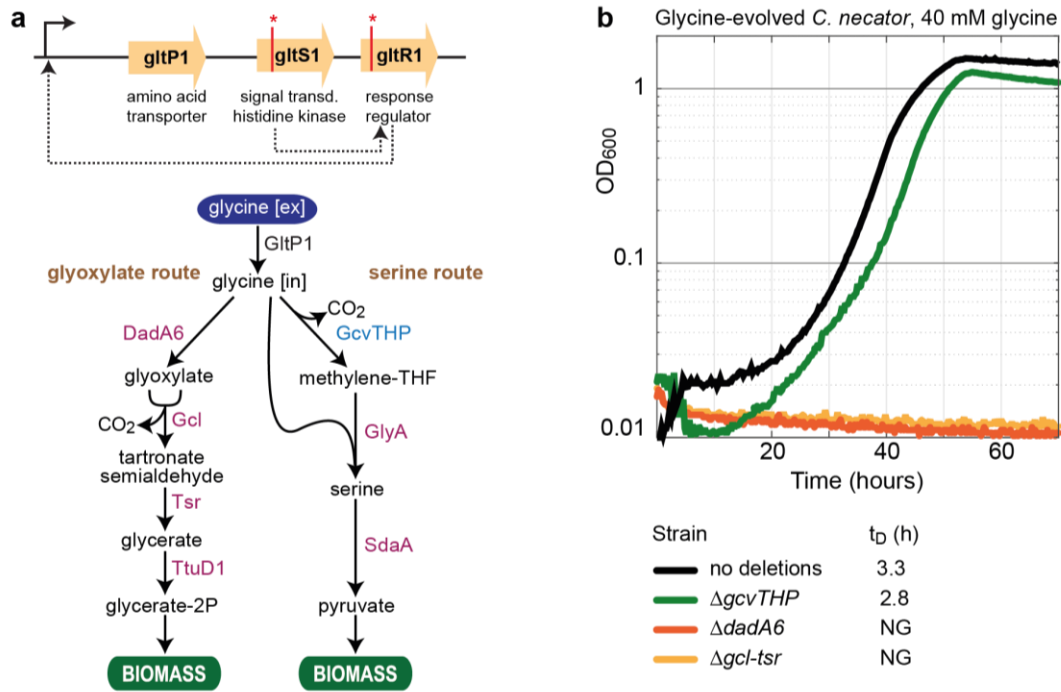

148

149

150

151

152

153

154

155

156

157

158

**Figure 3. *C. necator* can grow on glycine after short evolution via an oxidative pathway.** (a) Three independently evolved strains harbored mutations either in *gltR1* or *gltS1* (Supplementary Data 1), the regulator system of the amino acid transporter *gltP1*. Within the cell, glycine can be oxidized to glyoxylate by *DadA6* and assimilated through the glyoxylate pathway, the transcription of which was highly upregulated (Supplementary Data 2). Alternatively, glycine can be metabolized via glycine cleavage (by the GCS) and converted to serine and pyruvate. (b) Growth of the evolved strain on glycine with or without further gene deletions, as indicated in the legend. This experiment confirms that glycine is assimilated via the “glyoxylate route” rather than the “serine route”. Growth experiments were conducted in 96-well plate readers on a minimal medium (JMM) supplemented with 40 mM glycine and 10% CO<sub>2</sub> in the headspace. Growth experiments were performed in triplicates and showed identical growth curves ( $\pm 5\%$ ); hence, representative curves and average doubling times ( $t_D$ ) are shown. All experiments were repeated independently at least three times and showed highly similar growth behavior.

159

160

161

162

163

164

165

166

167

168

169

170

171

We analyzed the transcriptome of one of the evolved strains. In comparison to the WT strain growing on pyruvate, we observed >1,000-fold increase of *gltP1* transcription in the evolved strain growing on glycine. It therefore seems that *GltP1* acts as a glycine transporter and that glycine, once within the cell, activates a native route for its metabolism. To uncover this endogenous glycine assimilation pathway we checked which other genes were significantly overexpressed in the glycine-assimilating strain (Supplementary Data 2). *dadA6*, encoding for a putative FAD-dependent D-amino acid dehydrogenase, was amongst the 10 most upregulated genes (~200-fold increase in transcript abundance). Given that a similar enzyme from *Bacillus subtilis* was demonstrated to oxidize both D-amino acids and glycine<sup>22</sup>, we speculated that *DadA6* can also oxidize glycine to glyoxylate. In addition, the genes encoding for glyoxylate carboligase (*gcl*), tartronate semialdehyde reductase (*tsr*), and glycerate kinase (*ttuD1*) were amongst the 10 most upregulated genes (>1600-fold, ~400-fold, ~300-fold increased transcript, respectively). This led us to speculate that glycine is assimilated via oxidation to glyoxylate, followed by the activity of the well-known glycerate pathway<sup>18,19</sup> (Fig. 3a).





197 encoding for the GCS, which would be essential for growth on glycine via the “serine route” (Fig 3a), did not  
198 substantially affect growth (green line in Fig. 3b). This unequivocally confirms that rather than operating the  
199 “serine route”, as in the original design of the rGlyP, *C. necator* assimilates glycine via the “glyoxylate route”  
200 (Fig. 3a).

### 201 **Growth on formate via the ‘glyoxylate’ variant of the reductive glycine pathway**

202 We aimed to integrate the two segments of the rGlyP (Fig. 5a). We hypothesized that overexpression of the  
203 enzymes of the upper segment – converting formate to glycine – would suffice to establish growth on formate,  
204 as the accumulation of glycine would induce the glycine-assimilating segment, as shown above. First, we  
205 deleted the genes encoding for both Rubisco isozymes (*cbbSLc2* on chromosome 2 and *cbbSLp* on a  
206 megaplasmid) in a non-evolved *C. necator*<sup>23</sup>, thus abolishing growth on formate via the Calvin cycle. We  
207 transformed this strain with pC1 and pC2 carrying different combinations of promoters (Methods and Fig. S1,  
208 S2). After two weeks of incubation in a minimal medium with formate (10% CO<sub>2</sub> and 100 mM bicarbonate) we  
209 observed growth of three cultures harboring pC1-p<sub>14</sub> and pC2-p<sub>3</sub>. Upon reinoculation to a fresh medium with  
210 formate, these strains, which we termed CRG1 (*C. necator* rGlyP 1), were able to immediately grow on  
211 formate, albeit at a low growth rate (purple line in Fig. 5c represents one of this strains, having a doubling time  
212 56 h). To test whether glycine assimilation proceeds via the “glyoxylate route” (Fig. 3a), as was the case when  
213 glycine was provided in the medium, we deleted *dadA6* in a CRG1 strain. This CRG1  $\Delta$ *dadA6* strain was  
214 effectively unable to grow on formate (light red line in Fig. 5c), confirming that the growth of the CRG1 strain  
215 takes place via glycine oxidation (Fig. 5a).

216 We sequenced the CRG1 strains and found mutations both in the genome (Supplementary Data 3) and on  
217 the plasmid (Fig. S1). Several of these mutations occurred in all three CRG1 strains. One such shared  
218 mutation occurred inside the promoter p<sub>3</sub> on the pC2 plasmid, resulting in the mutated promoter p<sub>3mut1</sub> with an  
219 order of magnitude lower strength (Methods and Fig. S2). Another shared mutation was the deletion of  
220 *ccbRc2*, which encodes for the key activator of all Calvin cycle genes, activating both CO<sub>2</sub> fixation operons on  
221 chromosome 2 and the megaplasmid<sup>24</sup>. The contribution of this deletion to growth might be attributed to the  
222 downregulation of phosphoribulokinase, which upon the deletion of Rubisco, generates the dead-end  
223 metabolite ribulose 1,5-bisphosphate.

224 As the initial high expression of the GCS seems to be deleterious (as suggested by the mutated promoter),  
225 we decided to replace its overexpression from a plasmid with genomic overexpression. We therefore cured  
226 the CRG1 strain from the pC2 plasmid and replaced the native, genomic promoter of the GCS operon with six  
227 constitutive promoters of different strength (Methods and Fig. S1, S2). We inoculated this strain in a minimal  
228 medium with formate (at 10% CO<sub>2</sub> and 100 mM bicarbonate). After four weeks, we observed growth of several  
229 cultures harboring different GCS promoters. Reinoculation of these strains in fresh media with formate  
230 enabled immediate growth. The strain, in which the genomic GCS was engineered under the control of p<sub>3</sub>,  
231 was termed CRG2. The CRG2 strain showed the best growth and was further analyzed.

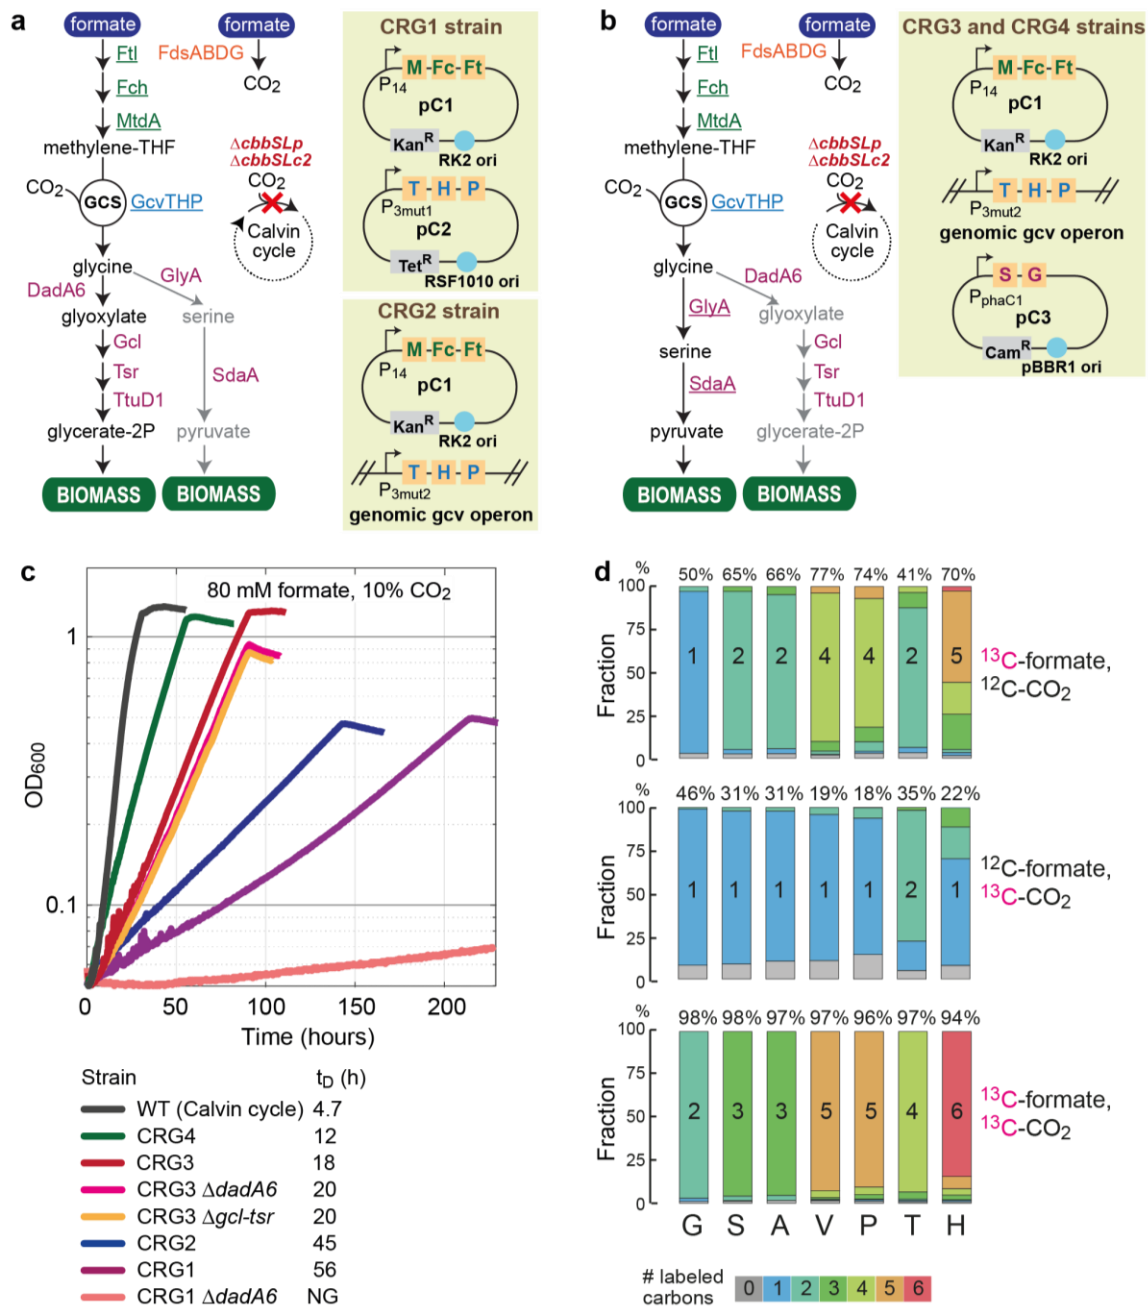

232

233 **Figure 5. Establishing and optimizing *C. necator* formatotrophic growth via the rGlyP.** (a) Formatotrophic growth of a *C. necator*  
 234 strain (in which the Calvin cycle was disrupted) using the 'glyoxylate' variant of the rGly was made possible after short-term evolution  
 235 upon expression of the upper segment of the pathway (underlined enzymes) either on plasmid or within the genome ('M' corresponds  
 236 to *mtdA*; 'Fc' to *fch*; 'Ft' to *ftt*; 'T' to *gcvT*; 'H' to *gcvH*; and 'P' to *gcvP*). The promoter controlling the expression of the GCS gene was  
 237 mutated both on a plasmid (CRG1 strain) and in the genome (CRG2 strain) (Fig. S1, S2, S3 and Supplementary Data 3). (b)  
 238 Formatotrophic growth of a *C. necator* strain (in which the Calvin cycle was disrupted) using the 'serine' variant of the rGly was made  
 239 possible upon expression of the lower segment of the pathway (underlined enzymes in purple) within the CRG2 strain ('S' to *sdaA*  
 240 and 'G' to *glyA*). The CRG4 strain was obtained after short-term evolution of the CRG3 strain. (c) Growth of different strains on formate.  
 241 Growth experiments were performed in 96-well plates on a minimal medium (JMM) supplemented with 80 mM formate, 100 mM  
 242 bicarbonate and 10% CO<sub>2</sub>. Experiments were considered in triplicates that showed identical growth curves ( $\pm 5\%$ ); hence, a  
 243 representative curve and average doubling times ( $t_D$ ) are shown. All experiments were repeated independently at least twice and

244 showed highly similar growth behavior. (d). <sup>13</sup>C-labeling of proteinogenic amino acids ('G' corresponds to glycine; 'S' to serine; 'A' to  
245 alanine; 'V' to valine, 'P' to proline; 'T' to threonine; and 'H' to histidine) upon cultivation of the CRG4 strain on different combinations  
246 of labeled and unlabeled formate and CO<sub>2</sub>. Numbers written above the bars correspond to the overall fraction of labeled carbons. The  
247 labeling confirms the activity of the pathway and indicate low cyclic flux via the TCA cycle (Fig. S4). Labeling experiments are averages  
248 from duplicates. The CRG2 strain showed a faster growth on formate than the CRG1 strains, having a doubling time of 45 hours (blue  
249 line in Fig. 5c). We sequenced the genome of the CRG2 strain and identified a few mutations (Supplementary Data 4). Among these,  
250 one was directly downstream of promoter p<sub>3</sub>. We conducted quantitative PCR and found that the expression of *gcvT* (the first gene in  
251 the GCS operon) was an order of magnitude higher with the p<sub>3mut2</sub> promoter than with the original p<sub>3</sub> promoter (Fig. S3). Interestingly,  
252 the transcript level of *gcvT* in the CRG2 strain (genomic expression via p<sub>3mut2</sub>) was similar to that observed in the CRG1 strain when  
253 the GCS was expressed on a plasmid under the regulation of p<sub>3mut1</sub> (Fig. S3).

## 254 Improved growth on formate via the 'serine' variant of the reductive glycine pathway

255 The "glyoxylate route" for glycine assimilation is less efficient than the "serine route", as the former wastes  
256 reducing power during glycine oxidation; specifically, the expected pyruvate yield from formate using the  
257 "serine route" is >30% higher than with the "glyoxylate route" (Fig. 1b). We therefore aimed to force glycine  
258 assimilation via the "serine route", bypassing its oxidation (Fig. 5b). We cloned the native genes encoding for  
259 serine hydroxymethyltransferase (*glyA*) and serine deaminase (*sdaA*) – the two components of the "serine  
260 route" – and assembled them into a synthetic operon on a plasmid, which we termed pC3, under the control  
261 of four different constitutive promoters of varying strength (Methods and Fig. S1, S2). We transformed the  
262 CRG2 strain with the pC3 plasmid and tested whether its growth rate was improved. We found that expression  
263 of *glyA* and *sdaA* from the medium promoter p<sub>phaC1</sub> improved growth the most, decreasing doubling time to 18  
264 hours and increasing biomass yield (i.e., final OD<sub>600</sub>) by more than 2-fold (red line in Fig. 5c). To check whether  
265 this strain, which we termed CRG3, is indeed independent on the "glyoxylate route" we deleted either *dadA6*  
266 or *gcl-tsR*. Neither of these deletions substantially altered the growth phenotype (pink and orange lines in Fig.  
267 5c), confirming that the "serine route" replaced the "glyoxylate route". The CRG3 thus assimilates formate via  
268 the rGlyP using its original, more efficient design.

269 To further improve growth on formate, we conducted a short-term adaptive evolution, in which, upon reaching  
270 stationary phase, the culture was reinoculated in fresh medium at OD<sub>600</sub> of 0.05. After a several cycles of  
271 cultivation, the growth rate of the culture increased. We isolated a strain, termed CRG4, in which the growth  
272 rate increased by 50% (doubling time of 12 hours, green line in Fig. 5c). We sequenced the genome of strain  
273 CRG4 and found several mutations, none of which in genes or regulatory elements directly related to the  
274 rGlyP (Supplementary Data 5). We measured the exact biomass yield of the CRG4 strain and found it to be  
275 2.6 gCDW/mol formate, similar to the biomass yield of the WT strain growing on formate via the Calvin cycle,  
276 2.9 gCDW/mol formate.

277 To confirm that growth of the CRG4 strain takes place via the rGlyP we performed <sup>13</sup>C-labeling experiments.  
278 We cultivated the strain with <sup>13</sup>C-formate/<sup>12</sup>CO<sub>2</sub>, <sup>12</sup>C-formate/<sup>13</sup>CO<sub>2</sub>, or <sup>13</sup>C-formate/<sup>13</sup>CO<sub>2</sub>, and measured the  
279 labeling pattern of proteinogenic glycine, serine, alanine, valine, proline, threonine, and histidine; these amino

280 acids either directly relate to the activity of the rGlyP or originate from different parts of central metabolism,  
281 thus providing an indication of key metabolic fluxes (Fig. S4). When cultivated on  $^{13}\text{C}$ -formate/ $^{13}\text{CO}_2$ , all amino  
282 acids were 94-98% labeled (text above the bars in Fig. 5d), indicating that formate and  $\text{CO}_2$  indeed serve as  
283 the only carbon sources (as formate and  $\text{CO}_2$  are only 98-99% labeled, 100% labeling of the amino acids is  
284 not achievable). The different labeling patterns of glycine, serine, alanine, and valine when fed with  $^{13}\text{C}$ -  
285 formate/ $^{12}\text{CO}_2$  or  $^{12}\text{C}$ -formate/ $^{13}\text{CO}_2$  (Fig. 5d) match the expected pattern from the activity of the rGlyP (Fig.  
286 S4). The labeling pattern of proline and threonine, which are derived from intermediates of the tricarboxylic  
287 acid (TCA) cycle (Fig. 5d), indicate a very low cyclic flux (Fig. S4). This is consistent with the use of formate  
288 as a primary reducing power and energy source, thus making the full oxidation of acetyl-CoA unnecessary.

## 289 Discussion

290 In this study, we demonstrated the successful engineering and optimization of the synthetic rGlyP in *C.*  
291 *necator*, replacing the Calvin cycle for supporting growth on formate. To facilitate this, we divided the pathway  
292 into two segments – (i) formate conversion to glycine and (ii) glycine assimilation to biomass – and explored  
293 the activity of each separately before combining them into a full pathway. We discovered that *C. necator* can  
294 effectively assimilate intracellular glycine into biomass via its oxidation to glyoxylate and the activity of the  
295 glycerate pathway. However, since this route is rather inefficient due to a wasteful dissipation of reducing  
296 power, we replaced it with glycine conversion to serine and pyruvate. We further demonstrated the strength  
297 of integrating both rational design and short-term evolution to optimize pathway activity. This approach  
298 enabled us to more than double the growth yield on formate and increase growth rate almost 4-fold (Fig. 5c).

299 During the short-term adaptive evolution, we identified several mutations that might have contributed to the  
300 improved growth. However, as manipulating *C. necator*'s genome is difficult, a systematic exploration of the  
301 contribution of each mutation to the phenotype could not be easily performed. Moreover, while shifting  
302 overexpression from a plasmid to the genome improved growth (i.e., the genes of the GCS), we were not able  
303 to replace all plasmids with genomic expression as the introduction of multiple-gene operon (e.g., *ftl-fch-mtdA*)  
304 into *C. necator*'s genome is still a challenging task. Once more effective tools for engineering the genome of  
305 this bacterium become available, it will be possible to further optimize the activity of the rGlyP and explore in  
306 detail the cellular adaptation towards efficient assimilation of formate.

307 Replacing *C. necator*'s Calvin cycle with the rGlyP has the potential to substantially increase biomass yield  
308 on formate. However, in this study we were able only to match the yield of the natural route. This should not  
309 come as a surprise as the bacterium is still not fully adapted to the use of the synthetic pathway. Further  
310 optimization of pathway activity, using both rational engineering and long-term evolution is expected to boost  
311 growth rate and yield of our strain.

312 The *C. necator* strain utilizing the rGlyP compares favorably with a recently evolved *E. coli* strain that grew on  
313 formate via the Calvin cycle with a doubling time of 18 hours<sup>25</sup>. Nevertheless, a recently engineered *E. coli*

314 strain growing on formate via the rGlyP displayed faster growth (doubling time of  $\approx 8$  hours), albeit with a  
315 somewhat lower biomass yield ( $2.3 \text{ gCDW/mol-formate}$ )<sup>26</sup>. However, in the long run – following further rational  
316 optimization and adaptive evolution – *C. necator* may outcompete *E. coli* due to a marked advantage: the use  
317 of a highly efficient, metal-dependent formate dehydrogenase (FDH). Specifically, in the *E. coli* studies, a  
318 metal-free FDH was used, which can be easily expressed in a foreign host but is limited by poor kinetics ( $k_{\text{cat}}$   
319  $\leq 10 \text{ sec}^{-1}$ )<sup>27</sup>. On the other hand, molybdenum/tungsten-dependent FDHs, as those natively used by *C.*  
320 *necator*<sup>28,29</sup>, are very fast ( $k_{\text{cat}}$  typically exceeds  $100 \text{ sec}^{-1}$ ), but are difficult to heterologously express to enable  
321 sufficient *in vivo* activity. At the current stage, the identity of the FDH variant might not be important, as growth  
322 is likely limited by metabolic factors other than the supply of reducing power and energy. However, as we  
323 keep improving formatotrophic growth via the rGlyP, the supply of reducing power will become more and more  
324 limiting, and the bacterium that harbors the more efficient FDH could have a clear advantage<sup>16</sup>.

325 The successful implementation of the rGlyP into both *E. coli* and *C. necator* (for which less genetic tools are  
326 available) suggests that this pathway is robust enough to be introduced to various relevant hosts. This  
327 robustness can be attributed to several factors, including the use of mostly ubiquitous enzymes, a linear  
328 structure that avoids the need for balancing fluxes within a cyclic route, and operation at the periphery of  
329 metabolism, thus negating deleterious clashes with central metabolism. The implementation of the rGlyP in  
330 multiple biotechnologically-relevant microorganisms therefore seems a viable strategy, providing flexible  
331 platforms for valorizing CO<sub>2</sub>-derived formate into a myriad of value-added chemicals.

## 332 **Methods**

### 333 **Bacterial strains and conjugation**

334 A *C. necator* H16 strain knocked out for polyhydroxybutyrate biosynthesis ( $\Delta\text{phaC1}$ ) was used as a platform  
335 strain for engineering in this study (kindly donated by O. Lenz)<sup>30</sup>. *E. coli* DH5 $\alpha$  was used for routine cloning,  
336 while *E. coli* NEB10-beta was used for cloning of larger vectors. *E. coli* S17-1 was used for conjugation of  
337 mobilizable plasmids to *C. necator* by biparental overnight spot mating. *C. necator* transconjugants were  
338 selected on LB agar plates with the appropriate selection marker and  $10 \mu\text{g/ml}$  gentamycin for counter-  
339 selection of *E. coli*. A complete overview of strain genotypes used in this study can be found in Table S1.

### 340 ***C. necator* genomic gene deletions**

341 Genomic knockouts of target genes and operons were generated using the pLO3 suicide vector (kindly  
342 donated by O. Lenz), similar to the previously described methods<sup>31,32</sup>. In short, homology arms upstream and  
343 downstream of the knockout site of  $\sim 1 \text{ kb}$  were PCR amplified by Phusion HF polymerase (Thermo Scientific).  
344 Homology arms were assembled into digested (Sacl, Xbal) or PCR-amplified pLO3 backbone via Gibson  
345 Assembly (HiFi, NEB or In-fusion, Takara). *C. necator* was conjugated with the pLO3 vectors and single-cross  
346 overs were selected on tetracycline. Transconjugants were grown overnight without tetracycline to allow for

347 the second cross-over event. These cells were plated and pure knockout clones were screened by colony  
348 PCR using OneTaq (Thermo Scientific).

### 349 Promoter library

350 A constitutive promoter library was constructed using oligos for short promoter sequences and PCR  
351 amplification of longer promoter sequences. Our initial library consisted of the constitutive promoters  $p_2$ ,  $p_3$ ,  
352  $p_4$  and  $p_{14}$ , which are from the  $p_{trc}$ -derived library of Mutalik *et al.* developed for *E. coli*<sup>33</sup>. The promoters were  
353 cloned by restriction ligation into broad-host range vectors with different ori's: pSEVA521, pSEVA531 and  
354 pSEVA551, together with a synthetic RBS and GPF (cargo #7 from SEVA system)<sup>34</sup>. Relative promoter  
355 strength was measured based on GFP fluorescence as explained below (Fig. S2). All four promoters  
356 expressed GFP at different strengths in *C. necator*, but we found their relative strength ranking in *C. necator*  
357 (weak to strong:  $p_{14} \rightarrow p_3 \rightarrow p_4 \rightarrow p_2$ ) to be scrambled when comparing to the previously identified order in *E.*  
358 *coli*<sup>33</sup> (weak to strong:  $p_4 \rightarrow p_{14} \rightarrow p_2 \rightarrow p_3$ ). The promoters from this initial library appeared rather strong in *C.*  
359 *necator*. Furthermore,  $p_{14}$  was the weakest promoter in a vector with a RK2 origin of replication, but in vectors  
360 with higher copy number ori's (RSF1010 and pBBR1<sup>35</sup>) it appeared to be a medium-strength promoter,  
361 stronger than  $p_3$ ; the other three promoters kept their respective ranking  $p_3 \rightarrow p_4 \rightarrow p_2$ . (Note: *C. necator* could  
362 not be conjugated with strongest promoter  $p_2$  on the highest tested copy number ori pBBR1, likely due to too  
363 high expression burden). To allow better benchmarking of our library and expanding the strength range  
364 especially with weaker promoters we included in our expanded library constitutive promoters previously tested  
365 in *C. necator*:  $p_{tac}^{35-37}$ ,  $p_{cat}^{38}$ ,  $p_{lac}^{35-37}$ ,  $p_{phaC1}^{35-38}$ ,  $p_{j5}^{35}$ . We also included the native *C. necator*  $p_{pgi}$  promoter  
366 (phosphoglucoisomerase) as we expected that this central glycolytic promoter could be an additional  
367 interesting constitutive promoter as seen before in *E. coli*<sup>39</sup>. A broader range of promoter strengths was  
368 found, including several weaker promoters, and the previously described strongest  $p_{j5}$  was also the strongest  
369 of our 10 tested promoters in the full library (Fig. S2).

### 370 Pathway enzyme expression plasmids

371 Genes *ftl*, *fch* and *mtdA* were PCR-amplified from *M. extorquens* AM1 genomic DNA (similar GC-content to  
372 *C. necator*, so no codon optimization needed). A synthetic RBS was included for each gene by PCR, which  
373 was designed by RBS Calculator<sup>40</sup> to have a medium-strength of ~30,000 arbitrary units, taking into account  
374 the context of the 5' UTR and start of the gene. The genes were assembled using Gibson assembly in  
375 pSEVA221 vectors with four different promoters ( $p_2$ ,  $p_3$ ,  $p_4$  and  $p_{14}$ ) generating a library of pC1 vectors. Genes  
376 *gcvT* and *gcvHP* were PCR amplified from the *C. necator* genome and synthetic RBSs were included for *gcvT*  
377 and *gcvH* designed as described above. The synthetic operon was assembled via Gibson assembly in  
378 pSEVA551 using three different promoters ( $p_2$ ,  $p_3$ ,  $p_4$ ) generating the pC2 vectors. pC3 was constructed by  
379 PCR amplification of *C. necator*'s *sdaA* and *glyA* with their native RBSs and assembled in pSEVA331 with the  
380 promoters  $p_3$ ,  $p_4$ ,  $p_{cat}$ ,  $p_{phaC1}$ , the latter two weaker promoters were included as our previous experience with  
381 pC1 and pC2 showed that the weaker promoters of the library gave better growth phenotypes. pDadA6 was

382 generated for heterologous DadA6 expression in an *E. coli* glyoxylate biosensor, the *C. necator dadA6* gene  
383 was amplified with a synthetic RBS and assembled into pSEVA531 with the strong *E. coli* promoter p<sub>3</sub>.

### 384 ***gcvTHP* operon promoter exchange**

385 To optimize overexpression of the native *gcvTHP* operon from the genome the native promoter was  
386 exchanged by 6 different promoters ranging from weak to strong (p<sub>cat</sub>, p<sub>phaC1</sub>, p<sub>3</sub>, p<sub>4</sub>, p<sub>2</sub>, p<sub>5</sub>) as we had no good  
387 indication of what level of genomic expression was desired. To allow for promoter exchange, we constructed  
388 a pLO3 suicide vector with ~1000 bp homology arms flanking the native p<sub>gcvTHP</sub> promoter. In between the  
389 homology arms different PCR-amplified promoters were inserted by restriction digestion (using *Ascl*/*Xba*I).  
390 The knock-in protocol was the same as for the knockouts in *C. necator* described above.

### 391 ***E. coli* glyoxylate biosensor strain construction**

392 The *E. coli* SIJ488 strain based upon K-12 MG1655<sup>41</sup>, was used for the generation of the glyoxylate biosensor  
393 strain. SIJ488 is engineered to carry the gene deletion machinery in its genome (inducible recombinase and  
394 flippase). All gene deletions were carried out by successive rounds of λ-Red recombineering using kanamycin  
395 cassettes (FRT-PGK-gb2-neo-FRT (KAN), Gene Bridges, Germany) or chloramphenicol cassettes (pKD3<sup>42</sup>)  
396 as described before<sup>43</sup>. Homologous extensions (50 bp) for the deletion cassettes were generated by PCR.  
397 The sensor strain required overexpression of the malate synthase (*glcB*), hence, the endogenous gene was  
398 amplified from *E. coli* genomic DNA using a two-step PCR (to remove cloning system relevant restriction  
399 sites<sup>39</sup> – in this case a single site). The *glcB* gene was subsequently cloned into cloning vector pNivB<sup>44</sup> using  
400 restriction and ligation (Mph1103I/*Xho*I), generating pNivB-glcB. The *glcB* gene was subsequently cloned from  
401 pNivB-*glcB* into a BioBrick adapted pKI<sup>39</sup> suicide vector for integration at the Safe Site 9<sup>45</sup> under the control of  
402 a strong constitutive promoter in the *E. coli* genome using enzymes *Eco*RI and *Pst*I, resulting in pKI-SS9-B-  
403 glcB. In brief, the knock-in system relies on conjugation of the suicide vector via a ST18 *E. coli* strain which  
404 requires 5-aminolevulinic acid for growth<sup>46</sup> and a sucrose (*sacB*) counterselection system (system described  
405 in full in<sup>39</sup>).

### 406 **Growth medium and conditions**

407 *C. necator* and *E. coli* were cultivated for routine cultivation and genetic modifications on Lysogeny Broth (LB)  
408 (1% NaCl, 0.5% yeast extract and 1% tryptone). When appropriate the antibiotics kanamycin (100 µg/mL for  
409 *C. necator* or 50 µg/mL for *E. coli*), tetracycline (10 µg/mL), chloramphenicol (30 µg/mL), ampicillin (100 µg/mL  
410 for *E. coli*) or gentamycin (10 µg/mL for *C. necator*) were added. Routine cultivation was performed in 3 mL  
411 medium in 12 mL glass tubes in a shaker incubator at 240 rpm. *C. necator* was cultivated at 30°C and *E. coli*  
412 at 37°C.

413 Growth characterization experiments of *C. necator* were performed in J Minimal Medium (JMM) a medium  
414 previously optimized for formatotrophic growth<sup>12</sup>. For formatotrophic growth 80 mM sodium formate was

415 added, as well as 100 mM sodium bicarbonate, pH was adjusted to 7.2 and incubation was performed under  
416 a headspace of 10% CO<sub>2</sub>. No antibiotics were added during growth characterization experiments. Growth of  
417 the glycine auxotroph was supplemented with 8 mM glycine when appropriate, while the glycine evolved strain  
418 was grown with 40 mM glycine. Organic carbon sources fructose or pyruvate were used for pre-cultures or  
419 control cultures at 20 and 40 mM respectively.

420 The *E. coli* glyoxylate biosensor was grown on M9 minimal medium (50 mM Na<sub>2</sub>HPO<sub>4</sub>, 20 mM KH<sub>2</sub>PO<sub>4</sub>, 1 mM  
421 NaCl, 20 mM NH<sub>4</sub>Cl, 2 mM MgSO<sub>4</sub> and 100 μM CaCl<sub>2</sub>) with trace elements (134 μM EDTA, 13 μM FeCl<sub>3</sub>·6H<sub>2</sub>O,  
422 6.2 μM ZnCl<sub>2</sub>, 0.76 μM CuCl<sub>2</sub>·2H<sub>2</sub>O, 0.42 μM CoCl<sub>2</sub>·2H<sub>2</sub>O, 1.62 μM H<sub>3</sub>BO<sub>3</sub>, 0.081 μM MnCl<sub>2</sub>·4H<sub>2</sub>O) with  
423 glycerol (10 mM) and supplemented with 10 mM glycine or glyoxylate when appropriate.

424 Growth curves were monitored during growth in 96 well-plates (Nunc transparent flat-bottom, Thermo  
425 Scientific). Precultured strains were washed twice and inoculated at an OD<sub>600</sub> of 0.01 (0.05 for growth on only  
426 formate). Each well contained 150 μl of culture topped with 50 μl of transparent mineral oil (Sigma-Aldrich) to  
427 avoid evaporation (O<sub>2</sub> and CO<sub>2</sub> can freely diffuse through this layer). Plates were incubated with continuous  
428 shaking (alternating between 1 minute orbital and 1 minute linear) in a BioTek Epoch 2 plate reader. OD<sub>600</sub>  
429 values were measured every 12 minutes. Growth data were processed by a Matlab script, converting plate  
430 reader OD<sub>600</sub> to cuvette OD<sub>600</sub> by multiplication by a factor 4.35 . All growth experiments were performed in at  
431 least in triplicates, and the growth curves shown are representative curves.

### 432 **Whole-genome sequencing**

433 *C. necator* genomes (and plasmids) were extracted for whole-genome sequencing using the GeneJET  
434 Genomic DNA Purification Kit (Thermo Fisher). Samples were sent for library preparation (Nextera, Illumina)  
435 and sequencing at an Illumina NovoSeq 6000 platform to obtain 150bp paired-end reads (Baseclear,  
436 Netherlands or Novogene, UK). Samples were paired, trimmed and assembled to the *C. necator* reference  
437 genome using Geneious 8.1 software. Mutations (frequency above >60%) were identified based on  
438 comparative analysis with the parental strains.

### 439 **Transcriptomic sequencing**

440 Cells were grown in triplicates on JMM 40 mM glycine and 40 mM pyruvate till mid-log phase and 1-2 mL of  
441 cultures were harvested and stabilized directly by RNA Protect Bacteria Kit (Qiagen). Cells were then lysed  
442 using lysozyme and beating with glass beads in a Retschmill (MM200) for 5 minutes at 30 hertz. RNA was  
443 purified using the RNeasy Mini kit (Qiagen) following manufacturer's protocol including on-column DNAase  
444 digestion (DNase kit Qiagen). rRNA depletion (RiboZero kit), cDNA library preparation, and paired-end 150  
445 bp read sequencing (Illumina HiSeq 3000) was performed by the Max Planck Genome Centre Cologne,  
446 Germany. Sequence data of all samples were mapped with STAR v2.5.4b <sup>47</sup> using default parameters.  
447 Ensembl version 38 genome reference in FASTA format and Ensembl version 38 cDNA Annotation in GTF



448 format were used for genome indexing with adapted parameters for genome size (--genomeSAindexNbases  
449 10) and read length (--sjdbOverhang 150) to ReadsPerGene files.

#### 450 **Promoter characterization with GFP**

451 *C. necator* strains overexpressing GFP and control cells without a plasmid were grown at least in triplicates  
452 in JMM with 20 mM fructose in 96-well plates as describe above. OD<sub>600</sub> and fluorescence (excitation 485 nm,  
453 emission 512 nm, gain 70) were detected in a Tecan Infinite 200 Pro plate reader. The strength of promoters  
454 was assessed based on fluorescence normalized per cell density (RFU/OD<sub>600</sub>) after 100 hours of cultivation,  
455 when all cultures were stationary. Values were corrected for the background fluorescence of cells without  
456 GFP.

#### 457 **Promoter characterization by quantitative PCR**

458 Cells with plasmid or genomic *gcv* from different promoters expression were grown at least in triplicates on  
459 JMM 20 mM fructose till mid-log phase and RNA isolation was performed as explained above (transcriptome  
460 sequencing). cDNA synthesis was performed using the Quantabio qScript cDNA Synthesis Kit according to  
461 the manufacturer's protocol. qPCR was performed with primers for *gcvT* (5'-caggacatggatatcaacacctc and 5'-  
462 aagtcacgctcgctctgc, product 77 bp) using the previously published primers for *gyrB* (gyrase) as a control gene  
463 to normalize expression levels<sup>48</sup>. Quantitative PCR was performed using SYBR Green /ROX qPCR Master  
464 Mix (Thermo Scientific) in an Applied Biosystems 7900HT Fast Real-Time PCR System according to the  
465 manufacturer's instructions. The qPCR protocol was: 10 min at 50°C, 5 min at 95°C, 40 cycles of 10 s at 95°C  
466 and 30 s at 60°C, and finally 1 min at 95°C. A dilution series of cDNA was made to generate a standard curve  
467 to correct for PCR efficiency. Data were analyzed as described in literature<sup>49</sup>.

#### 468 **Labeling of proteinogenic amino acids**

470 For labeling analysis of glycine auxotroph strains and CRG4, precultures were performed in JMM with 80 mM  
471 formate (and 20 mM fructose for glycine auxotroph) and 10% CO<sub>2</sub> in the headspace. Cells were then washed  
472 twice and re-inoculated at an OD<sub>600</sub> of 0.01 into the same media as the precultures, but when applicable  
473 sodium formate or CO<sub>2</sub> were replaced by <sup>13</sup>C sodium-formate (Sigma-Aldrich) and/or <sup>13</sup>CO<sub>2</sub> (Cambridge  
474 Isotope Laboratories). Cells were incubated in 3 mL in tubes, and for cultures with <sup>13</sup>CO<sub>2</sub> tubes were placed  
475 in an airtight 6L-dessicator (Lab Companion) filled with 10% <sup>13</sup>CO<sub>2</sub> and 90% air on a shaker platform (180  
476 rpm). When reaching stationary phase 1 mL of culture was harvested, washed twice with dH<sub>2</sub>O and  
477 resuspended in 1 mL 6 M HCl. Cells were hydrolyzed overnight at 95°C, and then evaporated under an  
478 airstream for 2-4 hours after which the hydrolysate was resuspended in 1 mL dH<sub>2</sub>O. The hydrolysate was  
479 analyzed using ultra-performance liquid chromatography (UPLC) (Acquity, Waters) using a HSS T3 C18-  
480 reversed-phase column (Waters). The mobile phases were 0.1% formic acid in H<sub>2</sub>O (A) and 0.1% formic acid  
481 in acetonitrile (B). The flow rate was 400 µL/min and the following gradient was used: 0-1 min 99% A; 1-5 min  
482 gradient from 99% A to 82%; 5-6 min gradient from 82% A to 1% A; 6-8 min 1% A; 8-8.5 min gradient to 99%

483 A; 8.5-11 min – re-equilibrate with 99% A. Mass spectra were acquired using an Exactive mass spectrometer  
484 (MS) (Thermo Scientific) in positive ionization mode. Data analysis was performed using Xcalibur (Thermo  
485 Scientific). The identification amino acids was based on retention times and m/z values obtained from amino  
486 acid standards (Sigma-Aldrich).

#### 487 **Dry weight yield experiments**

488 WT and CRG4 cells were cultured in duplicates in 30 mL JMM medium with 80 mM formate with 100 mM  
489 sodium bicarbonate and 10% CO<sub>2</sub> in 125 mL Erlenmeyer flasks. When cells were close to stationary phase  
490 the cultures were harvested and washed twice with dH<sub>2</sub>O and finally resuspended in 2 mL dH<sub>2</sub>O . Washed  
491 cell suspension were added to pre-weighed aluminum cups. Cells were dried for 24 hours at 90°C and cell  
492 weight was determined by weighing again. Residual concentrations of formate were checked by a Formate  
493 Assay Kit following the manufacturer's protocol (Sigma-Aldrich).

494

## 495 **Acknowledgements**

496 We thank Änne Michaelis for help with the LC-MS experiments. Steffen N. Lindner helped with the engineering  
497 of the *E. coli* glyoxylate biosensor strain. We thank Victor de Lorenzo's lab for providing us with the SEVA  
498 vectors and Tobias Erb for providing *Methylobacterium extorquens* genomic DNA. We thank the Max Planck  
499 Genome Centre Cologne (<http://mpgc.mpipz.mpg.de/home/>) for performing the RNA-sequencing in this study.  
500 Axel Fisher assisted with the bioinformatic analysis of the genome and transcriptome data. Eleftheria  
501 Saplaoura and Selcuk Aslan assisted with the quantitative PCR experiments. We thank Irene Sánchez-  
502 Andrea and Beau Dronsella for critical reading of this manuscript. This project was funded by the Max Planck  
503 Society. N.J.C. is funded by the Dutch Organization of Science (NWO) by a Rubicon (019.163LW.035) and a  
504 Veni (VI.Veni.192.156) fellowship.

## 505 **Author contributions**

506 This study was designed and supervised by N.J.C. and A.B.-E. Experiments were performed by N.C.J., G.B.-  
507 F, C.A.R.C., M.F.-B., L.F., N.G.-L., A.D.M., M.M.-P., W.N., G.S., J.V., S.dV. and S.Y. Data analysis was  
508 performed by all authors. The manuscript was written by N.J.C. and A.B.-E.

## 509 **Competing interests**

510 A.B.-E. is co-founder of b.fab, aiming to commercialize engineered C<sub>1</sub>-assimilation microorganisms. The  
511 company was not involved in any way in the conducting, funding, or influencing the research.

## 512 **Data availability**

513 Raw genome sequencing and transcriptome data will be deposited at NCBI. Complete information on the  
514 experimental setup as well as detailed results are available from the corresponding author upon reasonable  
515 request.

516

517

## 518 **References**

- 519 1. Liao, J. C., Mi, L., Pontrelli, S. & Luo, S. Fuelling the future: microbial engineering for the production  
520 of sustainable biofuels. *Nat. Rev. Microbiol.* **14**, 288–304 (2016).
- 521 2. Cotton, C. A. R. *et al.* Photosynthetic constraints on fuel from microbes. *Front. Bioeng. Biotechnol.* **3**,  
522 1–5 (2015).
- 523 3. Blankenship, R. E. *et al.* Comparing photosynthetic and photovoltaic efficiencies and recognizing the  
524 potential for improvement. *Science* **332**, 805–809 (2011).
- 525 4. Conrado, R. J., Haynes, C. A., Haendler, B. E. & Toone, E. J. Electrofuels: A New Paradigm for  
526 Renewable Fuels. in *Advanced Biofuels and Bioproducts* 1037–1064 (Springer, 2013).
- 527 5. Rabaey, K. & Rozendal, R. A. Microbial electrosynthesis - revisiting the electrical route for microbial  
528 production. *Nat. Rev. Microbiol.* **8**, 706–716 (2010).
- 529 6. Claassens, N. J., Cotton, C. A. R., Kopljar, D. & Bar-even, A. Making quantitative sense of  
530 electromicrobial production. *Nat. Catal.* **2**, 437–447 (2019).
- 531 7. Carvajal-arroyo, J. M., Pre, A., Rabaey, K. & Ganigue, R. Direct microbial electrosynthesis from CO<sub>2</sub> :  
532 forever a promise ? *Curr. Opin. Biotechnol.* **62**, 48–57 (2020).
- 533 8. Jouny, M., Luc, W. W. & Jiao, F. A General Techno-Economic Analysis of CO<sub>2</sub> Electrolysis Systems.  
534 *Ind. Eng. Chem. Res.* [acs.iecr.7b03514](https://doi.org/10.1021/acs.iecr.7b03514) (2018). doi:10.1021/acs.iecr.7b03514
- 535 9. Claassens, N. J. N. J., Sánchez-Andrea, I., Sousa, D. Z. D. Z. & Bar-Even, A. Towards sustainable  
536 feedstocks: A guide to electron donors for microbial carbon fixation. *Curr. Opin. Biotechnol.* **50**, 195–  
537 205 (2018).
- 538 10. Yishai, O., Lindner, S. N., Gonzalez de la Cruz, J., Tenenboim, H. & Bar-Even, A. The formate bio-  
539 economy. *Curr. Opin. Chem. Biol.* **35**, 1–9 (2016).
- 540 11. Grunwald, S. *et al.* Kinetic and stoichiometric characterization of organoautotrophic growth of  
541 *Ralstonia eutropha* on formic acid in fed-batch and continuous cultures. *Microb. Biotechnol.* **8**, 155–  
542 163 (2015).
- 543 12. Li, H. *et al.* Integrated Electromicrobial Conversion of CO<sub>2</sub> to Higher Alcohols. *Science* **335**, 1596–  
544 1596 (2012).
- 545 13. Marc, J. *et al.* Over expression of GroESL in *Cupriavidus necator* for heterotrophic and autotrophic  
546 isopropanol production. *Metab. Eng.* **42**, 74–84 (2017).
- 547 14. Krieg, A. T., Sydow, A., Faust, S. & Huth, I. CO<sub>2</sub> to terpenes - autotrophic and electroautotrophic  $\alpha$ -  
548 humulene production with *Cupriavidus necator*. *Angew Chem Int Ed Engl.* (2017).  
549 doi:10.1002/anie.201711302
- 550 15. Raberg, M., Volodina, E., Lin, K. & Steinbüchel, A. *Ralstonia eutropha* H16 in progress: Applications  
551 beside PHAs and establishment as production platform by advanced genetic tools. *Crit. Rev.*  
552 *Biotechnol.* **0**, 1–17 (2017).
- 553 16. Bar-Even, A., Noor, E., Flamholz, A. & Milo, R. Design and analysis of metabolic pathways supporting

- 554 formatotrophic growth for electricity-dependent cultivation of microbes. *Biochim. Biophys. Acta* **1827**,  
555 1039–47 (2013).
- 556 17. Cotton, C. A. R., Claassens, N. J., Benito-Vaquerizo, S. & Bar-even, A. Renewable methanol and  
557 formate as microbial feedstocks. *Curr. Opin. Biotechnol.* **62**, 168–180 (2020).
- 558 18. Hansen, R. W. & Hayashi, J. A. Glycolate metabolism in *Escherichia coli*. *J. Bacteriol.* **83**, 679–687  
559 (1962).
- 560 19. Eisenhut, M. *et al.* The photorespiratory glycolate metabolism is essential for cyanobacteria and might  
561 have been conveyed endosymbiontically to plants. *Proc. Natl. Acad. Sci. U. S. A.* **105**, 17199–204  
562 (2008).
- 563 20. Yishai, O., Bouzon, M., Bar-Even, A., Döring, V. & Bar-Even, A. In vivo assimilation of one-carbon via  
564 a synthetic reductive glycine pathway in *Escherichia coli*. *ACS Synth. Biol.* **7**, 2023–2028 (2018).
- 565 21. Marx, C. J., Laukel, M., Vorholt, J. A. & Lidstrom, M. E. Purification of the Formate-Tetrahydrofolate  
566 Ligase from *Methylobacterium extorquens* AM1 and Demonstration of Its Requirement for  
567 Methylo-trophic Growth. *J. Bacteriol.* **185**, 7169–7175 (2003).
- 568 22. Job, V., Marcone, G. L., Pilone, M. S. & Pollegioni, L. Glycine Oxidase from *Bacillus subtilis* quence  
569 homology is higher with enzymes such as. *J. Biol. Chem.* **277**, 6985–6993 (2002).
- 570 23. Pohlmann, A. *et al.* Genome sequence of the bioplastic-producing ‘Knallgas’ bacterium *Ralstonia*  
571 *eutropha* H16. *Nat. Biotechnol.* **24**, 1257–62 (2006).
- 572 24. Bowien, B. & Kusian, B. Genetics and control of CO<sub>2</sub> assimilation in the chemoautotroph *Ralstonia*  
573 *eutropha*. *Arch. Microbiol.* **178**, 85–93 (2002).
- 574 25. Bar-on, Y. M. & Milo, R. Conversion of *Escherichia coli* to generate all biomass carbon from CO<sub>2</sub>. *Cell*  
575 **179**, 1255-1263.e12 (2019).
- 576 26. Kim, S. *et al.* Growth of *E. coli* on formate and methanol via the reductive glycine pathway. *Nat.*  
577 *Chem. Biol.* doi:10.1038/s41589-020-0473-5
- 578 27. Bar-Even, A., Noor, E., Flamholz, A. & Milo, R. Design and analysis of metabolic pathways supporting  
579 formatotrophic growth for electricity-dependent cultivation of microbes. *Biochim. Biophys. Acta* **1827**,  
580 1039–47 (2013).
- 581 28. Cramm, R. Genomic view of energy metabolism in *Ralstonia eutropha* H16. *J. Mol. Microbiol.*  
582 *Biotechnol.* **16**, 38–52 (2009).
- 583 29. Friedebold, J. & Bowien, B. Physiological and biochemical characterization of the soluble formate  
584 dehydrogenase, a molybdoenzyme from *Alcaligenes eutrophus*. *J. Bacteriol.* **175**, 4719–4728 (1993).
- 585 30. Lütte, S. *et al.* Autotrophic production of stable-isotope-labeled arginine in *Ralstonia eutropha* strain  
586 H16. *Appl. Environ. Microbiol.* **78**, 7884–7890 (2012).
- 587 31. Lenz, O. & Friedrich, B. A novel multicomponent regulatory system mediates H<sub>2</sub> sensing in  
588 *Alcaligenes eutrophus*. *Proc Natl Acad Sci USA* **95**, 12474–12479 (1998).
- 589 32. Lenz, O., Schwartz, E. & DERNEDDE, J. The *Alcaligenes eutrophus* H16 *hoxX* gene participates in  
590 hydrogenase regulation. *J. Bacteriol.* **176**, 4385–4393 (1994).

- 591 33. Mutalik, V. K. *et al.* Precise and reliable gene expression via standard transcription and translation  
592 initiation elements. *Nat. Methods* **10**, 354–360 (2013).
- 593 34. Silva-Rocha, R. *et al.* The Standard European Vector Architecture (SEVA): a coherent platform for  
594 the analysis and deployment of complex prokaryotic phenotypes. *Nucleic Acids Res.* **41**, D666-75  
595 (2013).
- 596 35. Gruber, S., Hagen, J., Schwab, H. & Koefinger, P. Versatile and stable vectors for efficient gene  
597 expression in *Ralstonia eutropha* H16. *J. Biotechnol.* **192**, 410–418 (2014).
- 598 36. Fukui, T., Ohsawa, K., Mifune, J., Orita, I. & Nakamura, S. Evaluation of promoters for gene  
599 expression in polyhydroxyalkanoate- producing *Cupriavidus necator* H16. *Appl. Microbiol. Biotechnol.*  
600 **89**, 1527–1536 (2011).
- 601 37. Delamarre, S. C. & Batt, C. A. Comparative study of promoters for the production of  
602 polyhydroxyalkanoates in recombinant strains of *Wautersia eutropha*. *Appl. Microbiol. Biotechnol.* **71**,  
603 668–679 (2006).
- 604 38. Black, W. B., Zhang, L., Kamoku, C., Liao, J. C. & Li, H. Rearrangement of Coenzyme A-Acylated  
605 Carbon Chain Enables Synthesis of Isobutanol via a Novel Pathway in *Ralstonia eutropha*. *ACS*  
606 *Synth. Biol.* **7**, 794–800 (2018).
- 607 39. Wenk, S., Yishai, O. & Lindner, S. N. An Engineering Approach for Rewiring Microbial Metabolism. in  
608 *Methods in Enzymology* 1–39 (Elsevier Inc., 2018). doi:10.1016/bs.mie.2018.04.026
- 609 40. Salis, H. M., Mirsky, E. A. & Voigt, C. A. Automated design of synthetic ribosome binding sites to  
610 control protein expression. *Nat. Biotechnol.* **27**, 946–950 (2009).
- 611 41. Jensen, S. I., Lennen, R. M., Herrgård, M. J. & Nielsen, A. T. Seven gene deletions in seven days :  
612 Fast generation of *Escherichia coli* strains tolerant to acetate and osmotic stress. *Sci. Rep.* **5**, 17874  
613 (2015).
- 614 42. Datsenko, K. A. & Wanner, B. L. One-step inactivation of chromosomal genes in *Escherichia coli* K-  
615 12 using PCR products. *Proc Natl Acad Sci USA* **97**, 6640–6645 (2000).
- 616 43. Baba, T. *et al.* Construction of *Escherichia coli* K-12 in-frame, single-gene knockout mutants: the Keio  
617 collection. *Mol Syst Biol* **2**, (2006).
- 618 44. Zelcbuch, L. *et al.* Spanning high-dimensional expression space using ribosome-binding site  
619 combinatorics. *Nucleic Acids Res.* **41**, (2013).
- 620 45. Bassalo, M. C. *et al.* Rapid and Efficient One-Step Metabolic Pathway Integration in *E. coli*. *ACS*  
621 *Synth. Biol.* **5**, 561–568 (2016).
- 622 46. Thoma, S. & Schobert, M. An improved *Escherichia coli* donor strain for diparental mating. *FEMS*  
623 *Microbiol. Lett.* **294**, 127–132 (2009).
- 624 47. Dobin, A. *et al.* STAR: ultrafast universal RNA-seq aligner. *Bioinformatics* **29**, 15–21 (2013).
- 625 48. Jugder, B.-E., Welch, J., Braidy, N. & Marquis, C. P. Construction and use of a *Cupriavidus necator*  
626 H16 soluble hydrogenase promoter (P<sub>SH</sub>) fusion to *gfp* (green fluorescent protein). *PeerJ* **4**, e2269  
627 (2016).

- 628 49. Pfaffl, M. W. A new mathematical model for relative quantification in real-time RT – PCR. *Nucleic*  
629 *Acids Res.* **29**, 16–21 (2001).  
630  
631

632 **Supplementary Figures**

**PROMOTER**

P3

TGCCTTTAATTAATAAAAAATTTATTTGCTTATTAATCATCCGGCTCGTATAATGTGTGGAGGATCCTCTAGA  
ACGGAAATTAATTTTTTTAAATAAACGAAATAATTAGTAGGCCGAGCATATTAACACCTCCTAGGAGATCT

**Evolved P3 promoter on pGCV plasmid: P3mut1**

TGCCTTTAATTAATAAAAAATTTATTTGCTTATTAATCATCCGGCTCCTCTAATGTGTGGAGGATCCTCTAGA  
ACGGAAATTAATTTTTTTAAATAAACGAAATAATTAGTAGGCCGAGGAGATTAACACCTCCTAGGAGATCT

**Evolved P3 promoter upstream genomic locus gcvTPH: P3mut2**

TGCCTTTAATTAATAAAAAATTTATTTGCTTATTAATCATCCGGCTCGTATAATGTGTGGAGGATCCATCTAGA  
ACGGAAATTAATTTTTTTAAATAAACGAAATAATTAGTAGGCCGAGGAAATTAACACCTCCTAGGTAGATCT

P2

TGCCTTTAATTAATAAAAAAGAGTATTGACTTCGCATCTTTTTGTACCTATAATGTGTGGAGGATCCTCTAGA  
ACGGAAATTAATTTTTCTCATAACTGAAGCGTAGAAAAACATGGATATTAACACCTCCTAGGAGATCT

P4

TGCCTTTAATTAATTTGACATCAGGAAAAATTTTCTGTATAATGTGTGGAGGATCCTCTAGAGTCGACCTGCA  
ACGGAAATTAATTAACGTAGTCTTTTTAAAAAGACATATTAACACCTCCTAGGAGATCTCAGCTGGACGT

P14

TGCCTTTAATTAATTTGACATTAATCATCCGGCTCGTATAATGTGTGGAGGATCCTCTAGAGTCGACCTGCA  
ACGGAAATTAATTAACGTAAATTAGTAGGCCGAGCATATTAACACCTCCTAGGAGATCTCAGCTGGACGT

Plac

TGCCTTTAATTAATTTTACACTTTATGCTTCCGGCTCGTATGTTGCTCTAGAGTCGACCTGCAGGCATGCAAG  
ACGGAAATTAATTAAGTGAATACGAAGGCCGAGCATACAACGAGATCTCAGCTGGACGTCCTGACGTTT

Ptac

TGCCTTTAATTAATTTGACATTAATCATCCGGCTCGTATAATGGATCCTCTAGAGTCGACCTGCAGGCATGC  
ACGGAAATTAATTAACGTAAATTAGTAGCCGAGCATATTACCTAGGAGATCTCAGCTGGACGTCCTGACG

Pj5

TGCCTTTAATTAATAAAAAACCCTTATTGACACAGGTGGAAATTTAGAAATATACTGTTAGTAAGGATCCTCTAG  
ACGGAAATTAATTTTTTGGCAATAACTGTGTCACCTTTAAATCTTATATGACCAATCATTCTAGGAGATCT

Pcat

TGCCTTTAATTAATAAAATTTGGCGAAAATGAGACGTTGATCGGCACGTAAGAGTTCCAACTTTACCATAATG  
ACGGAAATTAATTTTTAACCGCTTTACTCTGCAACTAGCCGTGCATTCTCAAGGTTGAAAGTGGTATTAC  
AAATAAGATCACTACCGGGCGTATTTTTGAGTTATCGAGATTTTCAGGAGCTAAGGAAGCTAAAGGATCCT  
TTTATTCTAGTGATGGCCCGCATAAAAACTCAATAGCTCTAAAAGTCTCGATTCTTTCGATTCTCTAGGA  
CTAGAGTCGACCTGCAGGCATGCAAG  
GATCTCAGCTGGACGTCCTGACGTTT

Ppgi

TGCCTTTAATTAACAAGTGGTAACGATATGACGCCGCTGCCAGGCCGATCCCGGCAGCGCTGACGATATAC  
ACGGAAATTAATTTGTCACCATTGTCTACTGCGGGCAGCGTCCGGCTAGGGCCGTCGCGACTGCTATATG  
TTGCACTCTGTCTGTGAGCCGGCAACGCCACGGCTCGCGCAACCTCGATTGTCCTGCTCTAGAGTCGA  
AACGTAGAGACAGAACACTCGGCCGTTGCGGTGCGCCGAGCGCTTGGAGTAAACAGGACGAGATCTCAGCT  
CCTGCAGGCATGCAAGCTTAGGAGGA  
GGACGTCCGTACGTTTCAATCCTCCT

PphaC1

TGCCTTTAATTAAGCGCTGCATACCGTCCGGTAGGTCCGGGAAGCGTGCAGTCCGAGGCGGATCCCGCAT  
ACGGAAATTAATTTTCGCGACGTATGGCAGGCCATCCAGCCCTTCGACGCTACGCGCTCCGCTAAGGGCGTA  
TGACAGCGCGTGCCTTGCAAGGCAACAATGGACTCAATGTCTCGGAATCGCTGACGATCCAGGTTTCTC  
ACTGTCGCGCAGCAACGTTCCGTTGTTACTGAGTTTACAGAGCCTTAGCGACTGCTAAGGGTCCAAGAG  
CGGCAAGCATAGCGCATGGCTCTCCATGCGAGAAATGTCGCGCTTCCGGGATAAAAGGGGAGCCGCTATCGG  
GCCGTTTCGTATCCGTCACCGCAGAGGTACGCTCTTACAGCGCGCAACGCCCTATTTTCCCTCGGCGATAGCC  
AATGGACGCAAGCCACGGCCGAGCAGGTGCGGTGAGGGCTTCCAGCCAGTTCAGGGCAGATGTGCCGGC  
TTACCTGCGTTCCGTCGCGGCTCGTCCACGCCAGCTCCGAAAGGTCCGTCAGGTCCTACACGGCCG  
AGACCTCCCGCTTTGGGGAGGCGCAAGCCGGTCCATTCCGATAGCATCTCCCATGCAAAGTGGCCGCC  
TCTGGAGGGCGAAACCCCTCCGCTTCCGCTTCCGCCAGGTAAGCTTACGTAGAGGGGTACGTTTCCAGCCGG  
AGGGCAATGCCCGAGCCGTTTCAATAATCGGATCCTCTAGAGTCGACC  
TCCCGTTACGGGCTCGGCCAAGCTTATTAGCCTAGGAGATCTCAGCTGG

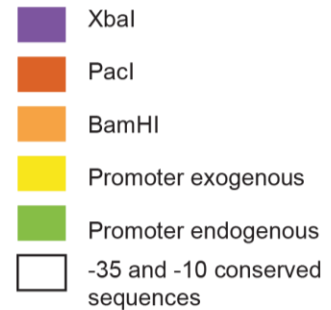

633

634

635

636

637

**Supplementary Figure 1. Constitutive promoters used and evolved during this study.** Sequences of a set of constitutive *E. coli* promoters (p<sub>2</sub>, p<sub>3</sub>, p<sub>4</sub> and p<sub>14</sub>), the *C. necator* p<sub>pgi</sub> (phosphoglucosomerase) promoter, and several constitutive promoters previously demonstrated to work in *C. necator*. During selection for growth on formate, promoter p<sub>3</sub> was mutated to p<sub>3mut1</sub> on the plasmid and to p<sub>3mut2</sub> on the genome (mutations are in red).



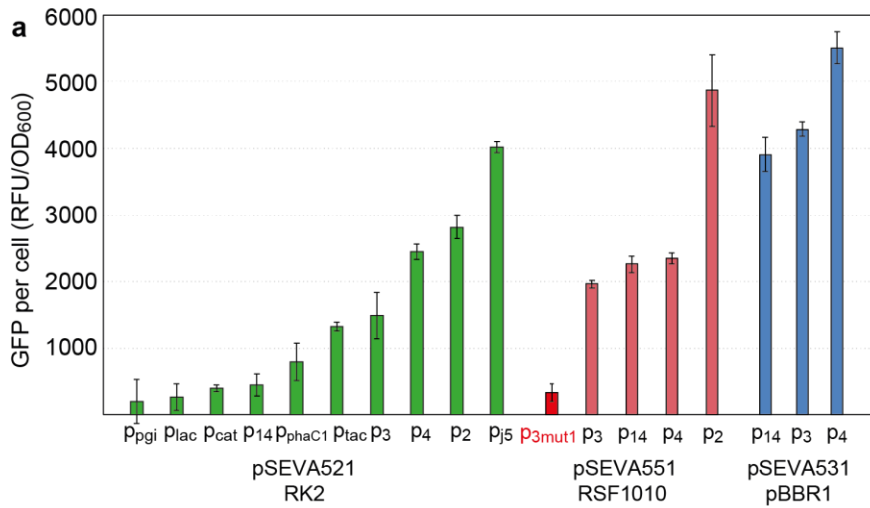

638

639

640

641

642

**Supplementary Figure 2. Strength of constitutive promoters on different plasmids.** Promoter sequences are shown in Supplementary Figure 1. p<sub>3mut1</sub> is a mutated version of p<sub>3</sub> which emerged during selection for growth on formate. GFP was used as a reporter. GFP expression was measured after 100 hours growth on a minimal medium (JMM) with 20 mM fructose in 96-well plates. Experiments were conducted in triplicates. Fluorescence was normalized to OD<sub>600</sub> and to auto-fluorescence of a wild-type *C. necator*.

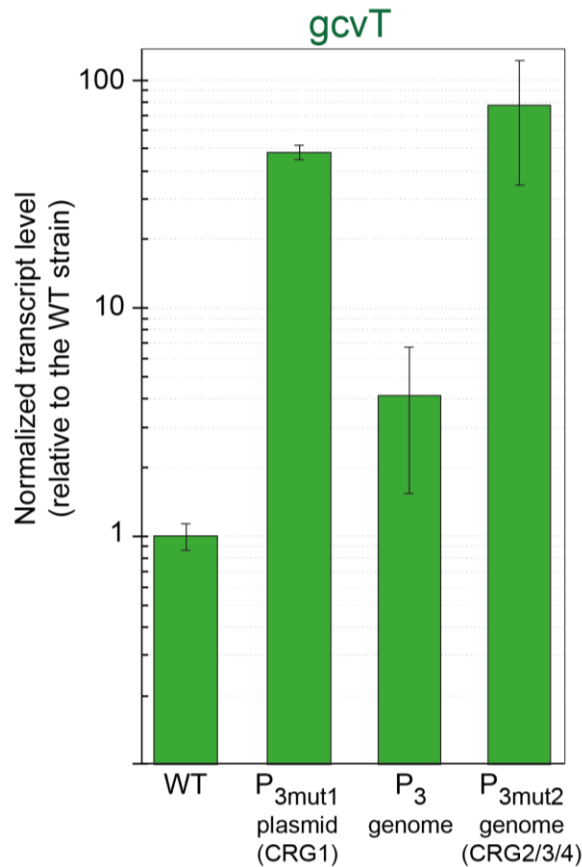

643

644

645

646

**Supplementary Figure 3. Quantitative PCR reveals transcription strength of gcvT from different p<sub>3</sub> and its mutated variants.** Experiments performed in triplicates and normalized according to the housekeeping gene *gyrA*. The results shown are normalized the *gcvT* transcript level in a wild-type *C. necator*.

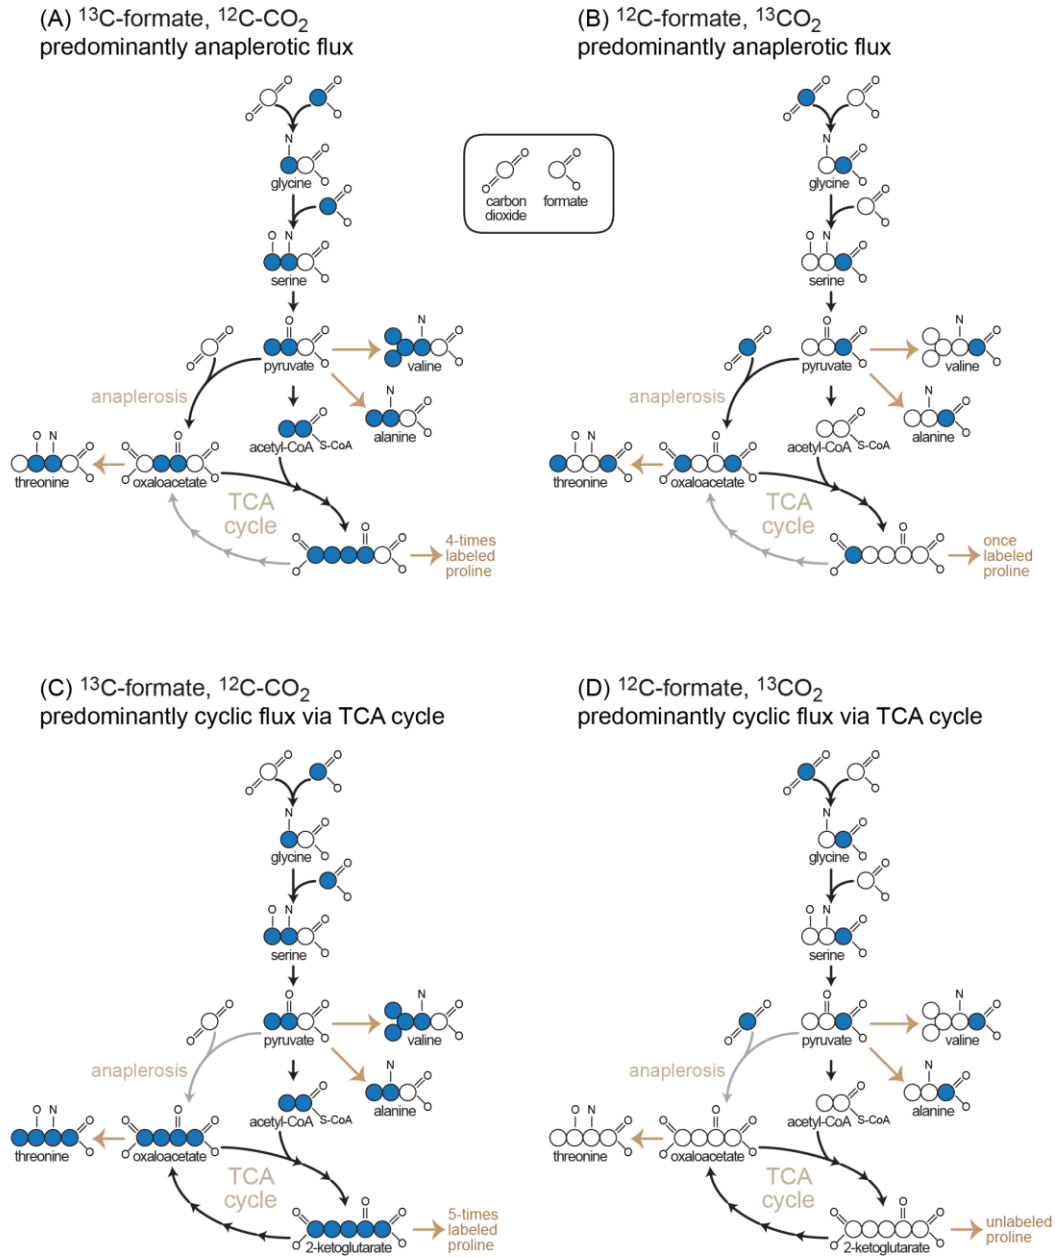

647

648

**Supplementary Figure 4. Expected labeling of proteinogenic amino acids upon feeding  $^{13}\text{C}$ -formate/ $^{12}\text{C}$ - $\text{CO}_2$  or  $^{12}\text{C}$ -formate/ $^{13}\text{C}$ - $\text{CO}_2$  according to different metabolic scenarios.**

649

650

651

652

653

654

655

656 **Supplementary Tables**

657

658 **Supplementary Table S1: Strains used in this study**

| Strain                              | Description                                                                                                                                                                             | Source     |
|-------------------------------------|-----------------------------------------------------------------------------------------------------------------------------------------------------------------------------------------|------------|
| wild-type <i>C. necator</i>         | <i>C. necator</i> H16 (DSMZ 428)                                                                                                                                                        | DSMZ       |
| base strain <i>C. necator</i>       | <i>C. necator</i> H16 $\Delta phaC1$                                                                                                                                                    | 1          |
| glycine auxotroph <i>C. necator</i> | <i>C. necator</i> H16 $\Delta phaC1 \Delta kbl \Delta ltaA \Delta glyA$                                                                                                                 | This study |
| Glycine-evolved <i>C. necator</i>   | <i>C. necator</i> H16 $\Delta phaC1 gtlR$ V406M                                                                                                                                         | This study |
| CRG1                                | <i>C. necator</i> H16 $\Delta phaC1 \Delta ccbSLc2 \Delta ccbSLc2$ pC1 (kan <sup>R</sup> ), pC2 (tet <sup>R</sup> ) (further mutations see Supplementary Data 3)                        | This study |
| CRG2                                | <i>C. necator</i> H16 $\Delta phaC1 \Delta ccbSLc2 \Delta ccbSLc2$ p <sub>GCVnative</sub> :: p <sub>3mut2</sub> , pC1 (kan <sup>R</sup> ), (further mutations see Supplementary Data 4) | This study |
| CRG3                                | <i>C. necator</i> H16 $\Delta phaC1 \Delta ccbSLc2 \Delta ccbSLc2$ p <sub>GCVnative</sub> :: p <sub>3mut2</sub> , pC1 (kan <sup>R</sup> ), pC3 (cam <sup>R</sup> )                      | This study |
| CRG4                                | evolved CRG3 (further mutations see Supplementary Data 5)                                                                                                                               | This study |
| <i>E. coli</i> S17-1                | <i>recA pro thi-1 hsdR</i><br>RP4-2-Tc::Mu-Km::Tn7 integrated into the chromosome (DSM 9079)                                                                                            | 2          |
| <i>E. coli</i> S18                  | <i>E. coli</i> S17-1 $\lambda pir \Delta hemaA$                                                                                                                                         | 3          |
| <i>E. coli</i> DH5 $\alpha$         | <i>fhuA2\Delta(argF-lacZ)U169 phoA glnV44 \Phi80\Delta(lacZ)M15 gyrA96 recA1 relA1 endA1 thi-1 hsdR17</i>                                                                               | NEB        |
| <i>E. coli</i> NEB10beta            | $\Delta(ara-leu)7697 araD139 fhuA \Delta lacX74 galK16 galE15 e14-\phi80dlacZ\Delta M15 recA1 relA1 endA1 nupG rpsL (StrR) rph spoT1 \Delta(mrr-hsdRMS-mcrBC)$                          | NEB        |
| <i>E. coli</i> SIJ488               | <i>E. coli</i> K-12 MG1655 Tn7::para-exo-beta-gam; prha-FLP; xylSpm-IsceI                                                                                                               | 4          |
| <i>E. coli</i> glyoxylate auxotroph | <i>E. coli</i> SIJ488 $\Delta gcl \Delta aceBAK \Delta glcDEFG \Delta ghrA \Delta ghrB \Delta maeA \Delta maeB \Delta ppc \Delta pck$ SafeSite9::promoter-strong-RBS-B-glcB             | This study |

659 **Supplementary Table S2: Plasmids used in this study**

| Plasmid  | Description                                                                                                                                                                                                                                                        | Source |
|----------|--------------------------------------------------------------------------------------------------------------------------------------------------------------------------------------------------------------------------------------------------------------------|--------|
| pLO3     | Suicide vector for knock-outs and promoter knock-ins in <i>C. necator</i> with multiple cloning site to clone homology arms, tetracycline resistance, pMB1 replication origin, RP4 origin of transfer and, <i>B. subtilis</i> <i>sacB</i> counter-selection marker | 5      |
| pSEVA221 | Standardized vector with multiple cloning site, kanamycin resistance, RK2 replication origin, and RP4 origin of transfer                                                                                                                                           | 6      |
| pSEVA331 | Standardized vector with multiple cloning site, chloroamphenicol resistance, pBBR1 replication origin, and RP4 origin of transfer                                                                                                                                  | 6      |

|                |                                                                                                                                                                                                                                                |            |
|----------------|------------------------------------------------------------------------------------------------------------------------------------------------------------------------------------------------------------------------------------------------|------------|
| pSEVA521       | Standardized vector with multiple cloning site, tetracycline resistance, RK2 replication origin, and RP4 origin of transfer                                                                                                                    | 6          |
| pSEVA521       | Standardized vector with multiple cloning site, tetracycline resistance, pBBR1 replication origin, and RP4 origin of transfer                                                                                                                  | 6          |
| pSEVA551       | Standardized vector with multiple cloning site, tetracycline resistance, RSF1010 replication origin, and RP4 origin of transfer                                                                                                                | 6          |
| pSEVA637       | Vector with GFP, gentamycin resistance, pBBR1 replication origin, and RP4 origin of transfer                                                                                                                                                   | 6          |
| pSEVA521-GFP   | pSEVA521 backbone with varying promoters, synthetic <i>C. necator</i> RBS and GFP                                                                                                                                                              | This study |
| pSEVA551-GFP   | pSEVA551 backbone with varying promoters, synthetic <i>C. necator</i> RBS and GFP                                                                                                                                                              | This study |
| pC1            | pSEVA221 backbone with varying promoters (P <sub>14</sub> , P <sub>3</sub> , P <sub>4</sub> , P <sub>2</sub> ) and synthetic RBSs (RBS Calculator ~30,000 au) with <i>M. extorquens mtdA</i> , <i>fch</i> and <i>ftl</i>                       | This study |
| pC2            | pSEVA551 backbone with varying promoters (P <sub>3mut1</sub> , P <sub>3</sub> , P <sub>4</sub> , P <sub>2</sub> ) and synthetic RBSs (RBS Calculator ~30,000 au) upstream of <i>C. necator gcvT</i> , <i>gcvH</i> and native RBS + <i>gcvP</i> | This study |
| pC3            | pSEVA551 backbone with varying promoters (P <sub>cat</sub> , P <sub>Phac</sub> , P <sub>3</sub> , P <sub>4</sub> ) and native RBSs with <i>C. necator sdaA</i> and <i>glyA</i>                                                                 | This study |
| pDadA6         | pSEVA531 backbone with P <sub>3</sub> promoter and native RBS and <i>C. necator dadA6</i>                                                                                                                                                      | This study |
| pNivB          | Cloning vector for BioBrick system with RBS-B, ampicilin resistance                                                                                                                                                                            | 7          |
| pNivB-glcB     | pNivB with <i>E. coli glcB</i> gene                                                                                                                                                                                                            | This study |
| pKI            | Conjugation/suicide vector for knockins, chloroamphenicol resistance, RK6 replication origin, <i>B. subtilis sacB</i> counter-selection marker,                                                                                                | 8          |
| pKI-SS9-B-glcB | pKI with homology arms (~600 bp) for safe-spot 9 integration, integration cassette with promoter S, RBS-B and <i>E. coli glcB</i> gene                                                                                                         | This study |

660

## 661 References supplementary tables

- 662 1. Lütte, S. *et al.* Autotrophic production of stable-isotope-labeled arginine in *Ralstonia eutropha* strain H16. *Appl.*  
663 *Environ. Microbiol.* **78**, 7884–7890 (2012).
- 664 2. Simon, R., Priefer, U. & Puhl, A. A broad host range mobilization system for in vivo genetic engineering:  
665 transposon mutagenesis in gram negative bacteria. *Nat. Biotechnol.* 784–791 (1983).
- 666 3. Thoma, S. & Schobert, M. An improved *Escherichia coli* donor strain for diparental mating. *FEMS Microbiol.*  
667 *Let.* **294**, 127–132 (2009).
- 668 4. Jensen, S. I., Lennen, R. M., Herrgård, M. J. & Nielsen, A. T. Seven gene deletions in seven days : Fast  
669 generation of *Escherichia coli* strains tolerant to acetate and osmotic stress. *Sci. Rep.* **5**, 17874 (2015).
- 670 5. Lenz, O. & Friedrich, B. A novel multicomponent regulatory system mediates H<sub>2</sub> sensing in *Alcaligenes*  
671 *eutrophus*. *Proc Natl Acad Sci USA* **95**, 12474–12479 (1998).
- 672 6. Silva-Rocha, R. *et al.* The Standard European Vector Architecture (SEVA): a coherent platform for the analysis  
673 and deployment of complex prokaryotic phenotypes. *Nucleic Acids Res.* **41**, D666-75 (2013).
- 674 7. Zelcbuch, L. *et al.* Spanning high-dimensional expression space using ribosome-binding site combinatorics.  
675 *Nucleic Acids Res.* **41**, (2013).
- 676 8. Wenk, S., Yishai, O. & Lindner, S. N. An Engineering Approach for Rewiring Microbial Metabolism. in *Methods*  
677 *in Enzymology* 1–39 (Elsevier Inc., 2018). doi:10.1016/bs.mie.2018.04.026
- 678

679

680

681

682

683

684

685

686
